# Supplementary material
Source: publisher figshare collection journal article supplement (https://geolsoc.figshare.com/ndownloader/files/34582718)
Supplement: Supplementary file 1 [file 34582718]

|                      | NAME OF THE SITE | REFERENCE      | DISTRICT    | GEOLOGICAL CONTEXT                                                                                      | ASSEMBLAGE RECOVERED                                                                                                                                                                                                                        |
|----------------------|------------------|----------------|-------------|---------------------------------------------------------------------------------------------------------|---------------------------------------------------------------------------------------------------------------------------------------------------------------------------------------------------------------------------------------------|
| <b>CENTRAL INDIA</b> |                  |                |             |                                                                                                         |                                                                                                                                                                                                                                             |
| 1                    | Burwaha          | IAR, 1970-1971 | West Nimar  | Artefacts from first and second gravel layers                                                           | Pebble tools                                                                                                                                                                                                                                |
| 2                    | Mortaka          | IAR, 1970-1971 | West Nimar  | Artefacts from first and second gravel layers                                                           | Pebble tools                                                                                                                                                                                                                                |
| 3                    | Durkadi Nullah   | IAR, 1970-1971 | West Nimar  | Black Cotton Soil overlaying silt, overlaying gravel (Topmost, Middle and Lower), overlaying basalt bed | Pebble artefacts from the gravel layer. Toolkit includes choppers (unifacial and bifacial), big and small side scrapers, discoids, scrapers made on flat pebble, unworked flake and chips, large number of cores on both flake and cobbles. |
| 4                    | Jannod           | IAR, 1959-1960 | Mandasore   | Artefacts from terrace system and gravels of Chambal and boulder conglomerate bed                       | Handaxes, cleavers, ovate, discoids, scraper cum cleaver in situ in upper gravel, Series II artefacts from third gravel layer and loose sand deposition layer.                                                                              |
| 5                    | Kotha            | IAR, 1959-1960 | Guna        | Implimentiferous gravel underlaying 12 ft. thick silt deposit.                                          | Series II tools found on the river bed of Betwa.                                                                                                                                                                                            |
| 6                    | Piparia          | IAR, 1959-1960 | Narsinghpur | Gravel bed                                                                                              | Artefacts belong to the pebble industry and were reported to be similar to those found in basal layers of second bed at Olduvai Gorge. Acheulean tools observed just above the second gravel.                                               |
| 7                    | Thaned           | IAR, 1959-1960 | Mandasore   | High Level Gravel running parallel to the stream for nearly half a mile                                 | Pebble tools and Clactonian cleavers found.                                                                                                                                                                                                 |

|    |           |                |                                   |                                                                                                 |                                                                                                                                                                                                         |
|----|-----------|----------------|-----------------------------------|-------------------------------------------------------------------------------------------------|---------------------------------------------------------------------------------------------------------------------------------------------------------------------------------------------------------|
| 8  | Takari    | IAR, 1959-1960 | Mandasore                         | High Level Gravel running parallel to the stream for nearly half a mile                         | Pebble tools and Clactonian cleavers found.                                                                                                                                                             |
| 9  | Shivna R. | IAR, 1959-1960 | Mandasore and Nahargarh Districts | Superimposition of gravel and tools                                                             | Second gravel with occasional occurrences of Series II artefacts made on yellow red and green jasper, overlaying older gravel. Series I tools with large cores and scrapers recovered from older gravel |
| 10 | Nahargarh | IAR, 1959-1960 | Nahargarh                         | Single loose gravel noticed on east bank of Chambal river                                       | Few cleaver and discoids found over the gravel. Which also yielded Series II tools including scrapers and fluted cores.                                                                                 |
| 11 | Retam R.  | IAR, 1959-1960 | Narsinghpur                       | Recent loose gravel deposit                                                                     | Series II tools on jasper along with handaxes, cleavers and discoids.                                                                                                                                   |
| 12 | Bandol    | IAR, 1959-1960 | Seoni                             | 5ft. thick bed of coarse pebble gravel overlying Deccan trap. Overlain by 15 ft. brownish silt. | Large choppers, discoidal cores, and scrapers on large flakes.                                                                                                                                          |
| 13 | Chhapara  | IAR, 1959-1960 | Seoni                             | Fine grained consolidated gravel                                                                | Series II type of artefacts. Toolkit: points, borers in chert, shouldered points, adze or axe like tools and thick blades.                                                                              |
| 14 | Suakhera  | IAR, 1959-1960 | Seoni                             | Fine grained consolidated gravel                                                                | Series II type of artefacts. Toolkit: points, borers in chert, shouldered points, adze or axe like tools and thick blades.                                                                              |
| 15 | Alonia    | IAR, 1959-1960 | Seoni                             | Fine grained consolidated gravel                                                                | Series II type of artefacts. Toolkit: points, borers in chert, shouldered points, adze or axe like tools and thick blades.                                                                              |

|    |                                      |                 |                              |                                                                                                                                                                           |                                                                                                                                                                                                                                                                                                                                                                                                                                                                                   |
|----|--------------------------------------|-----------------|------------------------------|---------------------------------------------------------------------------------------------------------------------------------------------------------------------------|-----------------------------------------------------------------------------------------------------------------------------------------------------------------------------------------------------------------------------------------------------------------------------------------------------------------------------------------------------------------------------------------------------------------------------------------------------------------------------------|
| 16 | River Murna (Tributary of river Son) | IAR, 1965-1966  | Shahdol                      | Sandstone bed capped with 1 m thick well cemented gravel with an eroded top.<br>Another section observed with pebbly gravel in clay.                                      | Late Stone Age artefacts including scrapers and blades, made on chert and chalcedony, collected from the eroded surface.<br>Middle Stone Age artefacts on greenish chert recovered from the pebbly gravel in clay.                                                                                                                                                                                                                                                                |
| 17 | Ganesh Nullah                        | IAR, 1966-1967  | West Nimar                   | Bouldary gravel at water level. 3m thick gravel resting on rock overlain by red brown kankary silt.                                                                       | Early Stone Age artefacts from the bouldary gravel.                                                                                                                                                                                                                                                                                                                                                                                                                               |
| 18 | Maheshwar,                           | IAR, 1966-1967  | West Nimar                   | Bouldary gravel overlaying red brown kankary silt, capped by yellow brown kankary silt.                                                                                   | Early Stone Age artefacts yielded from this gravel.                                                                                                                                                                                                                                                                                                                                                                                                                               |
| 19 | Kasrod Nullah                        | IAR, 1966-1967  | West Nimar                   | Bouldary gravel overlaying red brown kankary silt, capped by yellow brown kankary silt.                                                                                   | Early Stone Age artefacts yielded from this gravel.                                                                                                                                                                                                                                                                                                                                                                                                                               |
| 20 | Kalghat                              | IAR, 1966-1967  | West Nimar                   | Bouldary gravel overlaying red brown kankary silt, capped by yellow brown kankary silt.                                                                                   | Early Stone Age artefacts yielded from this gravel.                                                                                                                                                                                                                                                                                                                                                                                                                               |
| 21 | Ganbgakheri and Katghara Village     | IAR, 1982-1983  | 22°14' 72°2'<br>22°13' 76°1' | Weathered bouldary gravel                                                                                                                                                 | In-situ Lower Palaeolithic artefacts                                                                                                                                                                                                                                                                                                                                                                                                                                              |
| 22 | Katghara Village                     | IAR, 1982-1983  | 22°14' 72°2'<br>22°13' 76°1' | Weathered bouldary gravel                                                                                                                                                 | In-situ Lower Palaeolithic artefacts                                                                                                                                                                                                                                                                                                                                                                                                                                              |
| 23 | Seonath River                        | IAR, 1982-1983  | From Simga to Amlidih        | On preserved alluvial sections on both the banks two types of gravel observed: High level and low level. Such section observed near Karamsen, Nandghat, Limtara and Tulsi | Middle palaeolithic and upper palaeolithic tools yielded from these sections in stratified context.<br>Middle Palaeolithic toolkit comprising of choppers, miniature handaxes, borers, scrapers, flakes on chert, jasper and chalcedony, found on ground and from basal gravel layers.<br><br>Upper Palaeolithic sites located at high level ground yielding scrapers, borers, burins, blades, flakes, and cores dominantly made on chert and sometimes on chalcedony and jasper. |
| 24 | Biana Nala                           | Singh, R., 1965 | Lalitpur                     | Cemented gravel                                                                                                                                                           | Cleavers and Handaxes.                                                                                                                                                                                                                                                                                                                                                                                                                                                            |

|    |                    |                |              |                                                                                                                                                                                                  |                                                                                                                                                                                                                                     |
|----|--------------------|----------------|--------------|--------------------------------------------------------------------------------------------------------------------------------------------------------------------------------------------------|-------------------------------------------------------------------------------------------------------------------------------------------------------------------------------------------------------------------------------------|
| 25 | Rehla              | IAR, 1958-1959 | Sonar Valley | Highly cemented gravel bed                                                                                                                                                                       | Handaxe, ovate cleaver, scrapers, pebble cores, unworked flakes and bifacial choppers.                                                                                                                                              |
| 26 | Ghogra             | IAR, 1958-1959 | Sonar Valley | Highly cemented gravel bed                                                                                                                                                                       | Handaxe, ovate cleaver, scrapers, pebble cores, unworked flakes and bifacial choppers.                                                                                                                                              |
| 27 | Khoja Kheri        | IAR, 1958-1959 |              | Loosely consolidated gravel overlying partially consolidated, fine gravel and cross bedded gravel.                                                                                               | Series II artefacts comprising of scrapers, flakes and unifacial points on chert, recovered from loosely consolidated gravel and partially consolidated gravel.                                                                     |
| 28 | Kopra              | IAR, 1958-1959 |              | Loosely consolidated gravel overlying partially consolidated, fine gravel and cross bedded gravel.                                                                                               | Series II artefacts comprising of scrapers, flakes and unifacial points on chert, recovered from loosely consolidated gravel and partially consolidated gravel.                                                                     |
| 29 | Bhilsa to Mungaoli | IAR, 1958-1959 | Betwa river  | Disturbed gravel                                                                                                                                                                                 | Six stone age sites with assemblages comprising of cleavers, handaxes and flakes.                                                                                                                                                   |
| 30 | Maheshwar          | IAR, 1958-1959 | Maheshwar    | Three terraces: Terrace I consist large pebble gravel overlain by fine yellow silt.<br>Terrace II: lower part consist of small trap gravel and sand, highly calcareous and fairly well cemented. | Terrace I yielded Series I type of artefacts comprising of flakes, cleavers, handaxes and huge cores. Terrace II yielded Series II type of artefacts.                                                                               |
| 31 | Balri              | IAR, 1974-1975 | Harda        | Lateritic Gravel and Shingle bed.                                                                                                                                                                | Early and Middle Stone Age sites comprising of handaxes, cleavers, flakes and flake tools of Upper Acheulean character. Middle Stone Age tools comprise of scrapers, points, cores and discoidal cores made on chert and quartzite. |
| 32 | Bhadugaon          | IAR, 1974-1975 | Harda        | Lateritic Gravel and Shingle bed.                                                                                                                                                                | Early and Middle Stone Age sites comprising of handaxes, cleavers, flakes and flake tools of Upper                                                                                                                                  |

|    |                |                |       |                                   |                                                                                                                                                                                                                                     |
|----|----------------|----------------|-------|-----------------------------------|-------------------------------------------------------------------------------------------------------------------------------------------------------------------------------------------------------------------------------------|
|    |                |                |       |                                   | Acheulean character. Middle Stone Age tools comprise of scrapers, points, cores and discoidal cores made on chert and quartzite.                                                                                                    |
| 33 | Bhamori        | IAR, 1974-1975 | Harda | Lateritic Gravel and Shingle bed. | Early and Middle Stone Age sites comprising of handaxes, cleavers, flakes and flake tools of Upper Acheulean character. Middle Stone Age tools comprise of scrapers, points, cores and discoidal cores made on chert and quartzite. |
| 34 | Dhenki         | IAR, 1974-1975 | Harda | Lateritic Gravel and Shingle bed. | Early and Middle Stone Age sites comprising of handaxes, cleavers, flakes and flake tools of Upper Acheulean character. Middle Stone Age tools comprise of scrapers, points, cores and discoidal cores made on chert and quartzite. |
| 35 | Handia         | IAR, 1974-1975 | Harda | Lateritic Gravel and Shingle bed. | Early and Middle Stone Age sites comprising of handaxes, cleavers, flakes and flake tools of Upper Acheulean character. Middle Stone Age tools comprise of scrapers, points, cores and discoidal cores made on chert and quartzite. |
| 36 | Hirapur Khadan | IAR, 1974-1975 | Harda | Lateritic Gravel and Shingle bed. | Early and Middle Stone Age sites comprising of handaxes, cleavers, flakes and flake tools of Upper Acheulean character. Middle Stone Age tools comprise of scrapers, points, cores and discoidal cores made on chert and quartzite. |
| 37 | Joga Kalan     | IAR, 1974-1975 | Harda | Lateritic Gravel and Shingle bed. | Early and Middle Stone Age sites comprising of handaxes, cleavers, flakes and flake tools of Upper Acheulean character. Middle Stone Age tools comprise of scrapers, points, cores                                                  |

|    |                                                            |                  |             |                                                                |                                                                                                                                                                                                                                     |
|----|------------------------------------------------------------|------------------|-------------|----------------------------------------------------------------|-------------------------------------------------------------------------------------------------------------------------------------------------------------------------------------------------------------------------------------|
|    |                                                            |                  |             |                                                                | and discoidal cores made on chert and quartzite.                                                                                                                                                                                    |
| 38 | Malpone                                                    | IAR, 1974-1975   | Harda       | Lateritic Gravel and Shingle bed.                              | Early and Middle Stone Age sites comprising of handaxes, cleavers, flakes and flake tools of Upper Acheulean character. Middle Stone Age tools comprise of scrapers, points, cores and discoidal cores made on chert and quartzite. |
| 39 | Mangrol                                                    | IAR, 1974-1975   | Harda       | Lateritic Gravel and Shingle bed.                              | Early and Middle Stone Age sites comprising of handaxes, cleavers, flakes and flake tools of Upper Acheulean character. Middle Stone Age tools comprise of scrapers, points, cores and discoidal cores made on chert and quartzite. |
| 40 | Nayapura                                                   | IAR, 1974-1975   | Harda       | Lateritic Gravel and Shingle bed.                              | Early and Middle Stone Age sites comprising of handaxes, cleavers, flakes and flake tools of Upper Acheulean character. Middle Stone Age tools comprise of scrapers, points, cores and discoidal cores made on chert and quartzite. |
| 41 | Devakachar<br>(Talaya Ghat, Gauri<br>Umaria and Ratikarar) | IAR, 1981-1982   | Narsinghpur | Cemented gravel capped by yellow or red silt and loose gravel. | Lower Palaeolithic, Middle Palaeolithic and Mesolithic artefacts.                                                                                                                                                                   |
| 42 | Rampura                                                    | IAR, 1985-1986   | Narsinghpur | Red colored sandy pebbly gravel                                | Scraper, handaxe, cleaver, discoids, amorphous cores and flakes.                                                                                                                                                                    |
| 43 | Chinki                                                     | Salahuddin, 1987 | Narsinghpur | Unconsolidated gravely pebbly river bed                        | Early Acheulean artefacts                                                                                                                                                                                                           |
| 44 | Behagaon                                                   | IAR, 1984-1985   |             | Surface of weathered gravel                                    | Middle Palaeolithic assemblage                                                                                                                                                                                                      |
| 45 | Choral confluence                                          | IAR, 1984-1985   |             | Weathered gravel                                               | Lower Palaeolithic assemblage                                                                                                                                                                                                       |
| 46 | Ganesh Nala                                                | IAR, 1984-1985   |             | Surface of weathered gravel                                    | Middle Palaeolithic assemblage                                                                                                                                                                                                      |
| 47 | Gangatkheri                                                | IAR, 1984-1985   |             | Weathered gravel                                               | Lower Palaeolithic assemblage                                                                                                                                                                                                       |
| 48 | Mehtakheri                                                 | IAR, 1984-1985   |             | Weathered gravel                                               | Lower and Middle Palaeolithic assemblage                                                                                                                                                                                            |
| 49 | Nisarpur                                                   | IAR, 1984-1985   |             | Surface of weathered gravel                                    | Middle Palaeolithic assemblage                                                                                                                                                                                                      |

|    |               |                                                                                                                                                                                           |             |                                                                                                                                                           |                                                                                                                                                                                      |
|----|---------------|-------------------------------------------------------------------------------------------------------------------------------------------------------------------------------------------|-------------|-----------------------------------------------------------------------------------------------------------------------------------------------------------|--------------------------------------------------------------------------------------------------------------------------------------------------------------------------------------|
| 50 | Umeria        | Salahuddin<br>(unpublished, 1987 )<br>VSG                                                                                                                                                 | Narsinghpur | Unconsolidated Sandy pebble gravel                                                                                                                        | Late Acheulean artefacts.                                                                                                                                                            |
| 51 | Guarighat     | Salahuddin<br>(unpublished, 1987 )<br>VSG                                                                                                                                                 | Narsinghpur | Unconsolidated Sandy pebble gravel                                                                                                                        | Late Acheulean artefacts.                                                                                                                                                            |
| 52 | Belghat       | Salahuddin<br>(unpublished, 1987 )<br>VSG                                                                                                                                                 | Narsinghpur | Unconsolidated Sandy pebble gravel                                                                                                                        | Late Acheulean artefacts.                                                                                                                                                            |
| 53 | Bina Rivers   | IAR, 1960-1961                                                                                                                                                                            |             | Rubble gravel overlain by sandy silt<br>and underlain by yellowish silt                                                                                   | Series II type artefacts comprising of<br>cordiform bifaces, side and end<br>scrapers, points, discoids, side scrapers<br>and discs.                                                 |
| 54 | Dhasan Rivers | IAR, 1960-1961                                                                                                                                                                            |             | Rubble gravel overlain by sandy silt<br>and underlain by yellowish silt                                                                                   | Series II type artefacts comprising of<br>cordiform bifaces, side and end<br>scrapers, points, discoids, side scrapers<br>and discs.                                                 |
| 55 | Mohari        | IAR, 1960-1961                                                                                                                                                                            |             | Loose gravel                                                                                                                                              | Series I                                                                                                                                                                             |
| 56 | Bheraghat     | IAR, 1960-1961                                                                                                                                                                            | Jabalpur    | Lower gravels and clay of Narmada                                                                                                                         | Handaxes, cleavers, and choppers from<br>lower gravels. Blade and flake tools<br>were recovered from upper gravels and<br>clay along with mammalian fossils.                         |
| 57 | Hathnora      | Salahuddin <i>et al.</i><br>(1985). On the<br>archaeological<br>association of the fossil<br>hominid form<br>Hathnora, Madhya<br>Pradesh, India. <i>Ancient<br/>Perspectives</i> . 27 (2) |             | Cemented bouldary-pebbly gravel                                                                                                                           | Late Acheulean artefacts comprising of<br>cores, discoidal cores, side flake, end<br>flake and indeterminate flake and<br>scrapers. A partial hominin crania was<br>also discovered. |
| 58 | Samnapur      | Misra, V.N., <i>et al.</i><br>(1990)<br>Geoarchaeology of the<br>Palaeolithic Site at<br>Samnapur in the<br>Central Narmada<br>Valley. <i>Man and<br/>Environment</i> XV(1)               | Devakachar  | Reddish sticky clay overlain by<br>colluvio-alluvial gravel overlain by<br>reddish brown silt overlain by rubble<br>lens overlain by yellowish brown silt | Fresh as well as rolled Acheulean<br>artefacts in colluvio-alluvial silt and<br>Middle Palaeolithic artefacts along with<br>fossils in the rubble lens.                              |

|           |                     |                |             |                                                                          |                                                                                              |
|-----------|---------------------|----------------|-------------|--------------------------------------------------------------------------|----------------------------------------------------------------------------------------------|
| <b>59</b> | Ghora Kota          | IAR, 1958-1959 | Sagar       | Well cemented gravel                                                     | Three tools including one pebble tool in-situ the well cemented gravel layer                 |
| <b>60</b> | Bahmana             | IAR, 1960-1961 | Mandla      | Unconsolidated gravel in the exposed section along river Narmada         | Upper Palaeolithic and Microlithic assemblage.                                               |
| <b>61</b> | Narmada to sea      | IAR, 1961-1962 | Gujarat     | Cemented Gravel                                                          | Handaxe-cleaver complex.                                                                     |
| <b>62</b> | Banke-siddha        | IAR, 1961-1962 | Banda       | Gravel bed from a nullah adjacent to the site                            | Few chopper tools.                                                                           |
| <b>63</b> | Durendi             | IAR, 1961-1962 | Banda       | Implimentiferous gravel layer capped by thick alluvium                   | Unknown artefactual composition.                                                             |
| <b>64</b> | Sitapur             | IAR, 1961-1962 | Banda       | Gravel bed of the river                                                  | Early and Middle stone age tools.                                                            |
| <b>65</b> | Chopan              | IAR, 1962-1963 | Robertsganj | Gravel-bed of Son river                                                  | Rolled and patinated Middle Stone Age tools.                                                 |
| <b>66</b> | Reha                | IAR, 1964-1965 |             | Reddish gravelly soil                                                    | Bladelets, few crescents and cores.                                                          |
| <b>67</b> | Subarnarekha Valley | IAR, 1964-1965 |             | Decomposed granite overlain by gravel bed underlaying yellow brown soil. | Handaxes and choppers on quartz and quartzite                                                |
| <b>68</b> | Rampura             | IAR, 1965-1966 | Mandasore   | Cemented gravel                                                          | Early Stone Age artefacts                                                                    |
| <b>69</b> | Hanuman Bahari      | IAR, 1968-1969 |             | Cemented and uncemented gravels                                          | Pebble tools from cemented gravels and upper palaeolithic artefacts from uncemented gravels. |
| <b>70</b> | Gaya                | IAR, 1969-1970 | Gaya        | Basal gravel capped by red-brown silt                                    | Early and Middle Stone Age artefacts.                                                        |
| <b>71</b> | Lela Bandha Nullah  | IAR, 1973-1974 | Hazaribagh  | Gravel bed                                                               | Early Stone Age artefacts.                                                                   |
| <b>72</b> | Dhalua Nullah       | IAR, 1973-1974 | Melinda     | Cemented gravel                                                          | Middle Stone Age artefacts comprising of side scrapers, concave scrapers and blades.         |
| <b>73</b> | Chaura              | IAR, 1980-1981 | Mirzapur    | Cemented gravel                                                          | Middle Palaeolithic artefacts                                                                |
| <b>74</b> | Bijaura             | IAR, 1980-1981 | Mirzapur    | Alternating layers of loose gravel and very coarse sand                  | Middle Palaeolithic artefacts from the gravel                                                |
| <b>75</b> | Chopan              | IAR, 1980-1981 | Mirzapur    | Cross bedded gravel-sand deposit                                         | Middle Palaeolithic tools in this deposit.                                                   |



|           |                |                |                |                                                                                                                                                    |                                                                                                                                                                                                                                                         |
|-----------|----------------|----------------|----------------|----------------------------------------------------------------------------------------------------------------------------------------------------|---------------------------------------------------------------------------------------------------------------------------------------------------------------------------------------------------------------------------------------------------------|
| <b>76</b> | Mahagarha      | IAR, 1981-1982 | West Belan     | Planar and cross bedded sandstone gravel overlaying Intra-formational gravel                                                                       | Middle Palaeolithic artefacts were discovered from planar and cross bedded gravel. Upper to epi-palaeolithic or Mesolithic (25000-1000 BP) artefacts were observed in Intra-formational gravel.                                                         |
| <b>77</b> | Chillahia      | IAR, 1981-1982 | West Belan     | Planar and cross bedded sandstone gravel overlaying Intra-formational gravel                                                                       | Middle Palaeolithic artefacts were discovered from planar and cross bedded gravel. Upper to epi-palaeolithic or Mesolithic (25000-1000 BP) artefacts were observed in Intra-formational gravel.                                                         |
| <b>78</b> | Chopani-Mandi  | IAR, 1981-1982 | West Belan     | Planar and cross bedded sandstone gravel overlaying Intra-formational gravel                                                                       | Middle Palaeolithic artefacts were discovered from planar and cross bedded gravel. Upper to epi-palaeolithic or Mesolithic (25000-1000 BP) artefacts were observed in Intra-formational gravel.                                                         |
| <b>79</b> | Deoghat bridge | IAR, 1981-1982 | West Belan     | Planar and cross bedded sandstone gravel overlaying Intra-formational gravel                                                                       | Middle Palaeolithic artefacts were discovered from planar and cross bedded gravel. Upper to epi-palaeolithic or Mesolithic (25000-1000 BP) artefacts were observed in Intra-formational gravel.                                                         |
| <b>80</b> | Baghor         | IAR, 1981-1982 | Mid-Son Valley | Water laid sandstone cobbles and gravels overlaying Sihawal gravel further overlaying Patpara formation, gravelly clays and fluvialite depositions | Large core and flake, possibly Upper Palaeolithic artefacts have been recovered from topmost layer. Lower Palaeolithic artefacts discovered from the Sihawal gravel and Upper Acheulean to Middle Palaeolithic artefacts observed in Patpara formation. |
| <b>81</b> | Nakjhar Khurd  | IAR, 1981-1982 | Mid-Son Valley | Water laid sandstone cobbles and gravels overlaying Sihawal gravel further overlaying Patpara formation,                                           | Large core and flake, possibly Upper Palaeolithic artefacts have been recovered from topmost layer. Lower Palaeolithic artefacts discovered from                                                                                                        |

|                         |                                 |                                                                                                                                                       |                                |                                                                                                                                                                                                                                                                                                                                                                                                      |                                                                                                                                                                                                                                                         |
|-------------------------|---------------------------------|-------------------------------------------------------------------------------------------------------------------------------------------------------|--------------------------------|------------------------------------------------------------------------------------------------------------------------------------------------------------------------------------------------------------------------------------------------------------------------------------------------------------------------------------------------------------------------------------------------------|---------------------------------------------------------------------------------------------------------------------------------------------------------------------------------------------------------------------------------------------------------|
|                         |                                 |                                                                                                                                                       |                                | gravelly clays and fluvialite depositions                                                                                                                                                                                                                                                                                                                                                            | the Sihawal gravel and Upper Acheulean to Middle Palaeolithic artefacts observed in Patpara formation.                                                                                                                                                  |
| 82                      | Rampur                          | IAR, 1981-1982                                                                                                                                        | Mid-Son Valley                 | Water laid sandstone cobbles and gravels overlaying Sihawal gravel further overlaying Patpara formation, gravelly clays and fluvialite depositions                                                                                                                                                                                                                                                   | Large core and flake, possibly Upper Palaeolithic artefacts have been recovered from topmost layer. Lower Palaeolithic artefacts discovered from the Sihawal gravel and Upper Acheulean to Middle Palaeolithic artefacts observed in Patpara formation. |
| 83                      | Neodhia Bayalis                 | IAR, 1985-1986                                                                                                                                        | 9 km downstream from Baraundha | Gravel III overlain by red clay overlain by cemented by Gravel II overlain by cemented gravel I capped by silt.                                                                                                                                                                                                                                                                                      | Lower and Middle Palaeolithic artefacts and animal fossils discovered.                                                                                                                                                                                  |
| 84                      | Maihar                          | IAR, 1987-1988                                                                                                                                        | Satna                          | Gravel I of river section, 17m below the occupation level                                                                                                                                                                                                                                                                                                                                            | Acheulean artefacts.                                                                                                                                                                                                                                    |
| 85                      | Jhadwa Nullah                   | IAR, 1989-1990                                                                                                                                        | Mirzapur                       | Basal Bouldary gravel                                                                                                                                                                                                                                                                                                                                                                                | Acheulean artefacts                                                                                                                                                                                                                                     |
| 86                      | Dhansi                          | IAR, 2012-2013                                                                                                                                        | Hoshangabad                    | Pebble and artefact horizon (PAH)                                                                                                                                                                                                                                                                                                                                                                    | Variety of cores and flakes                                                                                                                                                                                                                             |
| <b>PENINSULAR INDIA</b> |                                 |                                                                                                                                                       |                                |                                                                                                                                                                                                                                                                                                                                                                                                      |                                                                                                                                                                                                                                                         |
| 87                      | Atner                           | Mishra, Sheila, Kale, V.S., Kshirsagar, Anupama. 1993. <i>High Level Gravel Occurrence near Atner on the Tapti River</i> . Bulletin of the DCPRI (53) | Tapti River                    | High level occurrences reported across Godavari, middle Krishna, Tungabhadra, and Mahi; Stone age artefacts reported from the surface of HLG; South side of the Tapti river extensive spread of chalcedony and quartz cobbles and pebbles; siliceous rocks are mostly angular and rounded basalt pieces occur; a few well rounded laterite pebbles also found; most of the HLG pre Acheulean in age; |                                                                                                                                                                                                                                                         |
| 88                      | Between Prakashe and Kukurmunde | IAR, 1956-1957                                                                                                                                        | Tapti River                    | Coarse gravel capped by 30 ft. silt deposit                                                                                                                                                                                                                                                                                                                                                          | Artefacts comprising of side, end and hollow scrapers.                                                                                                                                                                                                  |
| 89                      | Lad-Mod                         | IAR, 1954-1955                                                                                                                                        | Pravara river                  | Gravel                                                                                                                                                                                                                                                                                                                                                                                               | Acheulean artefacts, discovered on trap rock, comprised of small core, flakes, scrapers, blades and burins of jasper, carnelian and other soft material along                                                                                           |

|            |                         |                |                         |                                                                                                                                |                                                                                                                                                                                          |
|------------|-------------------------|----------------|-------------------------|--------------------------------------------------------------------------------------------------------------------------------|------------------------------------------------------------------------------------------------------------------------------------------------------------------------------------------|
|            |                         |                |                         |                                                                                                                                | with mammalian fossils in cemented gravel.                                                                                                                                               |
| <b>90</b>  | Shivyogamandir          | IAR, 1955-1956 | Badami                  | Pebble bed                                                                                                                     | Series I tools only.                                                                                                                                                                     |
| <b>91</b>  | Anagwadi                | IAR, 1955-1956 | Ghataprabha             | Pebble bed                                                                                                                     | Succession of tools from Series I, II and III                                                                                                                                            |
| <b>92</b>  | Bagalkot                | IAR, 1955-1956 | Ghataprabha             | Pebble bed                                                                                                                     | Succession of tools of Series I and Series II                                                                                                                                            |
| <b>93</b>  | Herkal                  | IAR, 1955-1956 | Karnataka               | Pebble bed                                                                                                                     | Series I and Series II artefacts                                                                                                                                                         |
| <b>94</b>  | Nevasa                  | IAR, 1955-1956 | Ahmadnagar              | Gravel deposits                                                                                                                | Series I and Series II artefacts                                                                                                                                                         |
| <b>95</b>  | Gangapur                | IAR, 1956-1957 | Upper Godavari valley   | Coarse pebbly conglomerate loosely cemented by gravelly matrix and separated by river bedrock overlaying a compact gravel bed. | Palaeolithic artefacts were discovered in upper part of the conglomerate and the overlaying gravel.<br>Handaxes, cleavers, ovate and flakes were discovered from the compact gravel bed. |
| <b>96</b>  | Deccan College premises | IAR, 1956-1957 | Pune                    | Gravel                                                                                                                         | Series II artefacts including burins.                                                                                                                                                    |
| <b>97</b>  | Khed                    | IAR, 1956-1957 | Pune                    | Stratified Gravel                                                                                                              | Series II artefacts were discovered from within stratified gravel and both Series I and II artefacts were observed on surface of the gravel.                                             |
| <b>98</b>  | Kandivali               | IAR, 1957-1958 | Padan Hill, Ulhas River | Weathered deposit of reddish earth and gravel                                                                                  | Different industries discovered (confirm from Todd's survey)                                                                                                                             |
| <b>99</b>  | Bhondgaon               | IAR, 1957-1958 | Khandesh                | Compact gravel conglomerate and loose calcareous pebble conglomerate                                                           | Abevellio-Acheulean handaxes, cleavers, discoids, scrapers etc., on trap and quartzite together with pebble tools were reported.                                                         |
| <b>100</b> | Amoda                   | IAR, 1957-1958 | Khandesh                | Compact gravel conglomerate and loose calcareous pebble conglomerate                                                           | Abevellio-Acheulean handaxes, cleavers, discoids, scrapers etc., on trap and quartzite together with pebble tools were reported.                                                         |
| <b>101</b> | Chopargaon              | IAR, 1957-1958 | Khandesh                | Loose gravel conglomerate bed                                                                                                  | Series II artefacts made on chert, jasper, and chalcedony reported.                                                                                                                      |
| <b>102</b> | Shajipur                | IAR, 1957-1958 | Khandesh                | Loose gravel conglomerate bed                                                                                                  | Series II artefacts made on chert, jasper, and chalcedony reported.                                                                                                                      |
| <b>103</b> | Thalner                 | IAR, 1957-1958 | Khandesh                | Loose gravel conglomerate bed                                                                                                  | Series II artefacts made on chert, jasper, and chalcedony reported.                                                                                                                      |
| <b>104</b> | Manjrod                 | IAR, 1957-1958 | Khandesh                | Loose gravel conglomerate bed                                                                                                  | Series II artefacts made on chert, jasper, and chalcedony reported.                                                                                                                      |

|            |          |                |          |                              |                                                                                                                                                       |                                                                          |
|------------|----------|----------------|----------|------------------------------|-------------------------------------------------------------------------------------------------------------------------------------------------------|--------------------------------------------------------------------------|
| <b>105</b> | Yadhoda  | IAR, 1957-1958 | Khandesh |                              | Loose gravel conglomerate bed                                                                                                                         | Series II artefacts made on chert, jasper, and chalcedony reported.      |
| <b>106</b> | Shajipur | IAR, 1957-1958 | Khandesh |                              | 2 ft. thick deposit of cemented gravel overlaying yellow silt mixed with kankar resting on loose gravel conglomerate bed yielding Series II artefacts | Blades, points, scrapers and awls belonging to Series III type reported. |
| <b>107</b> | Chorgain | IAR, 1957-1958 | Khandesh | District, around Tapti river | 2 ft. thick deposit of cemented gravel overlaying yellow silt mixed with kankar resting on loose gravel conglomerate bed yielding Series II artefacts | Blades, points, scrapers and awls belonging to Series III type reported. |
| <b>108</b> | Amoda    | IAR, 1957-1958 | Khandesh | District, around Tapti river | 2 ft. thick deposit of cemented gravel overlaying yellow silt mixed with kankar resting on loose gravel conglomerate bed yielding Series II artefacts | Blades, points, scrapers and awls belonging to Series III type reported. |
| <b>109</b> | Thalner  | IAR, 1957-1958 | Khandesh | District, around Tapti river | 2 ft. thick deposit of cemented gravel overlaying yellow silt mixed with kankar resting on loose gravel conglomerate bed yielding Series II artefacts | Blades, points, scrapers and awls belonging to Series III type reported. |
| <b>110</b> | Chorgaon | IAR, 1957-1958 | Khandesh | District, around Tapti river | 2 ft. thick deposit of cemented gravel overlaying yellow silt mixed with kankar resting on loose gravel conglomerate bed yielding Series II artefacts | Blades, points, scrapers and awls belonging to Series III type reported. |
| <b>111</b> | Manjrod  | IAR, 1957-1958 | Khandesh | District, around Tapti river | 2 ft. thick deposit of cemented gravel overlaying yellow silt mixed with kankar resting on loose gravel conglomerate bed yielding Series II artefacts | Blades, points, scrapers and awls belonging to Series III type reported. |
| <b>112</b> | Mudavad  | IAR, 1957-1958 | Khandesh | District, around Tapti river | 2 ft. thick deposit of cemented gravel overlaying yellow silt mixed with kankar resting on loose gravel conglomerate bed yielding Series II artefacts | Blades, points, scrapers and awls belonging to Series III type reported. |

|     |                                                 |                                                                                                                                                  |                                                  |                                                                                                                                                                                                                                                                                           |                                                                                                                                                                                                                                                                                                                                                                                                                                                             |
|-----|-------------------------------------------------|--------------------------------------------------------------------------------------------------------------------------------------------------|--------------------------------------------------|-------------------------------------------------------------------------------------------------------------------------------------------------------------------------------------------------------------------------------------------------------------------------------------------|-------------------------------------------------------------------------------------------------------------------------------------------------------------------------------------------------------------------------------------------------------------------------------------------------------------------------------------------------------------------------------------------------------------------------------------------------------------|
| 113 | Yadhoda                                         | IAR, 1957-1958                                                                                                                                   | Khandesh District, around Tapti river            | 2 ft. thick deposit of cemented gravel overlaying yellow silt mixed with kankar resting on loose gravel conglomerate bed yielding Series II artefacts                                                                                                                                     | Blades, points, scrapers and awls belonging to Series III type reported.                                                                                                                                                                                                                                                                                                                                                                                    |
| 114 | Bund Garden                                     | IAR, 1957-1958                                                                                                                                   | Mula-Mutha river                                 | Gravel                                                                                                                                                                                                                                                                                    | One Series I palaeolithic and a number of Series II Palaeolithic artefacts                                                                                                                                                                                                                                                                                                                                                                                  |
| 115 | Shikarpur                                       | IAR, 1957-1958                                                                                                                                   | Poona District                                   | Highly cemented gravel bed                                                                                                                                                                                                                                                                | Basaltic and dolerite flakes and pebble artefacts.                                                                                                                                                                                                                                                                                                                                                                                                          |
| 116 | Rushikonda                                      | Reddy, K.T., Prakash, P.V., Rath, Alok, Rao, U.B., 1995. <i>A Pebble Tool Assemblage on the Visakhapatnam Coast</i> . Man and Environment XX (1) | North of Visakhapatnam; 17°33'25" N; 83°23'03" E | Alluvial and Marine origin; Wave-cut Rock terrace, three parallel beach ridges at different elevations; Bolder and pebbles laid in ferruginous matrix found on the surface—artefacts from this layer and underlying fine gravel; TRENCH- 1.10m- 7 layers; pebbly bouldary layer at 45 cm; | Middle and Upper Palaeolithic, Mesolithic and Neolithic artefacts found on the surface—simple blades, backed blades, transverse arrowhead, burins, borers, points, cores, flakes, chips; Archaeological evidence from junction of the pebbly and bouldary gravel—artefacts made on split pebbles and split flakes; pebbles were flattish to sub rounded; unifacial choppers, worked split flakes, used split flakes, split pebbles, split flakes and anvil. |
| 117 | Kurnool District 46 sites (names not available) | IAR, 1958-1959                                                                                                                                   | Kurnool District, Andhra Pradesh                 | Gravel deposits                                                                                                                                                                                                                                                                           | Lithics belonging to Series I, II and III reported                                                                                                                                                                                                                                                                                                                                                                                                          |
| 118 | Udhamgadh                                       | IAR, 1958-1959                                                                                                                                   | West Khandesh. Tapti River Valley                | Gravel bed                                                                                                                                                                                                                                                                                | In situ artefacts belonging to Series II reported                                                                                                                                                                                                                                                                                                                                                                                                           |
| 119 |                                                 | IAR, 1959-1960                                                                                                                                   | Kurnool District, Andhra Pradesh                 | Two flood terraces followed by modern flood tool; Two gravel deposits in association with deposits of the river                                                                                                                                                                           | Gravel associated with first terrace yielded Series I type tools including some fresh Series II type tools; Younger gravels related to second terrace yielded artefacts belonging to later types with sometimes heavily rolled artefacts from earlier Series.                                                                                                                                                                                               |
| 120 | Nandur- Madhmeswar                              | IAR, 1959-1960                                                                                                                                   | Godavari River                                   | Second gravel, laying on a small terrace (terrace II)                                                                                                                                                                                                                                     | Series II type tools and occasionally Series I type tools                                                                                                                                                                                                                                                                                                                                                                                                   |
| 121 | Tamasvadi                                       | IAR, 1959-1960                                                                                                                                   | Godavari River                                   | Second gravel, laying on a small terrace (terrace II)                                                                                                                                                                                                                                     | Series II type tools and occasionally Series I type tools                                                                                                                                                                                                                                                                                                                                                                                                   |

|     |                   |                |                              |                                                                                               |                                                                                                                                                                                |
|-----|-------------------|----------------|------------------------------|-----------------------------------------------------------------------------------------------|--------------------------------------------------------------------------------------------------------------------------------------------------------------------------------|
| 122 | Belpandri         | IAR, 1959-1960 | Godavari River               | Second gravel, laying on a small terrace (terrace II)                                         | Series II type tools and occasionally Series I type tools                                                                                                                      |
| 123 | Suregaon          | IAR, 1959-1960 | Godavari River               | Second gravel, laying on a small terrace (terrace II)                                         | Series II type tools and occasionally Series I type tools                                                                                                                      |
| 124 | Bhalgain          | IAR, 1959-1960 | Godavari River               | Second gravel, laying on a small terrace (terrace II)                                         | Series II type tools and occasionally Series I type tools                                                                                                                      |
| 125 | Mehenduri         | IAR, 1959-1960 | Pravara River                | Second gravel, laying on a small terrace, terrace II                                          | Series II type tools and occasionally Series I type tools; along with animal fossils;                                                                                          |
| 126 | Gangapur          | IAR, 1959-1960 | Godavari                     | Reddish clay overlain by junction of clay and gravel                                          | Series I tools consisting of cleavers, scrapers, flakes, choppers and chopping tools at the junction of clay and gravel and in gravel itself.                                  |
| 127 | Wagheda           | IAR, 1959-1960 | Chanda District              | Thick layer of alluvium underlain by well cemented gravel                                     | Pebble handaxe, chopper, massive handaxe and a chopper extracted from the top of well cemented gravel.                                                                         |
| 128 | Khaira            | IAR, 1959-1960 | Nagpur District              | Sandy gravel lying on weathered Deccan trap                                                   | 35 artefacts were reported including scraper-blade-flake assemblage made on chert. The assemblage consisted of tortoise cores, discoidal cores, scrapers, points and choppers. |
| 129 | Pardi             | IAR, 1959-1960 | Wardha District              | Compact gravel                                                                                | Unknown composition                                                                                                                                                            |
| 130 | Papamiya ki Tekdi | IAR, 1960-1961 | Chanda District, Maharashtra | Exposed gravel of Jharpat river, tributary of Wardha. Gravel overlaying thick deposit of silt | Abevellio- Acheulean handaxes and cleavers, along with blades, scrapers, burins, borers, awls etc. early Series II sites, scrapers, borers and diminutive handaxes.            |
| 131 | Jhari- Mangmal    | IAR, 1960-1961 | Chanda District, Maharashtra | Gravel-conglomerate                                                                           | Bifacial pebble choppers, Abevellio-Acheulean handaxes and cleavers.                                                                                                           |
| 132 | Dabkaheti         | IAR, 1960-1961 | Chanda District, Maharashtra | Well exposed gravel sections                                                                  | Handaxes, cleavers and unifacial choppers.                                                                                                                                     |
| 133 | Khaparla-Khurd,   | IAR, 1960-1961 | Chanda District, Maharashtra | Well exposed gravel sections                                                                  | Handaxes, cleavers and unifacial choppers.                                                                                                                                     |
| 134 | Khapri            | IAR, 1960-1961 | Chanda District, Maharashtra | Well exposed gravel sections                                                                  | Handaxes, cleavers and unifacial choppers.                                                                                                                                     |
| 135 | Mahalgaoon        | IAR, 1960-1961 | Chanda District, Maharashtra | Well exposed gravel sections                                                                  | Handaxes, cleavers and unifacial choppers.                                                                                                                                     |

|            |              |                |                            |           |                                                             |                                                                                                                                |
|------------|--------------|----------------|----------------------------|-----------|-------------------------------------------------------------|--------------------------------------------------------------------------------------------------------------------------------|
| <b>136</b> | Minjhari     | IAR, 1960-1961 | Chanda<br>Maharashtra      | District, | Well exposed gravel sections                                | Handaxes, cleavers and unifacial choppers.                                                                                     |
| <b>137</b> | Titwi        | IAR, 1960-1961 | Chanda<br>Maharashtra      | District, | Well exposed gravel sections                                | Handaxes, cleavers and unifacial choppers.                                                                                     |
| <b>138</b> | Umri         | IAR, 1960-1961 | Chanda<br>Maharashtra      | District, | Well exposed gravel sections                                | Handaxes, cleavers and unifacial choppers.                                                                                     |
| <b>139</b> | Mandal       | IAR, 1960-1961 | Dhulia District            |           | Fine reddish gravel                                         | Two palaeoliths were reported, Ovate of Acheulean type and a flake. Late Stone Age artefacts were also reported.               |
| <b>140</b> | Bhana        | IAR, 1960-1961 | Dhulia District            |           | Fine reddish gravel                                         | Late Stone Age and microlithic artefacts along with fossilized animal bone were recovered.                                     |
| <b>141</b> | Champala     | IAR, 1960-1961 | Dhulia District            |           | Fine reddish gravel                                         | Late Stone Age and microlithic artefacts along with fossilized animal bone were recovered.                                     |
| <b>142</b> | Nagsar       | IAR, 1960-1961 | Dhulia District            |           | Fine reddish gravel                                         | Late Stone Age and microlithic artefacts along with fossilized animal bone were recovered.                                     |
| <b>143</b> | Nandurbar    | IAR, 1960-1961 | Dhulia District            |           | Fine reddish gravel                                         | Late Stone Age and microlithic artefacts along with fossilized animal bone were recovered.                                     |
| <b>144</b> | Shetti       | IAR, 1960-1961 | Dhulia District            |           | Fine reddish gravel                                         | Late Stone Age and microlithic artefacts along with fossilized animal bone were recovered.                                     |
| <b>145</b> | Talvad-Khurd | IAR, 1960-1961 | Dhulia District            |           | Fine reddish gravel                                         | Late Stone Age and microlithic artefacts along with fossilized animal bone were recovered.                                     |
| <b>146</b> | Nevasa       | IAR, 1961-1962 | Ahmednagar,<br>Maharashtra |           | Coarse Gravel, not well cemented overlying Deccan trap rock | Early Stone Age artefacts reported.                                                                                            |
| <b>147</b> | Bhadne       | IAR, 1961-1962 | Dhulia District            |           | Lowest gravel                                               | Early Stone Age artefacts comprising of handaxes, cleavers, choppers, discoids and ovates along with microliths were reported. |
| <b>148</b> | Gondas       | IAR, 1961-1962 | Dhulia District            |           | Lowest Gravel                                               | Middle Stone Age artefacts comprising of scrapers and points were reported.                                                    |
| <b>149</b> | Nandvan      | IAR, 1961-1962 | Dhulia District            |           | Gravel clay                                                 | Rolled Early Stone Age artefacts reported.                                                                                     |
| <b>150</b> | Chhandvel    | IAR, 1961-1962 | Dhulia District            |           | Gravel                                                      | Middle Stone Age reported.                                                                                                     |

|            |                 |                |                                |                                                                                                                                                                                              |                                                                                                                                                                                        |
|------------|-----------------|----------------|--------------------------------|----------------------------------------------------------------------------------------------------------------------------------------------------------------------------------------------|----------------------------------------------------------------------------------------------------------------------------------------------------------------------------------------|
| <b>151</b> | Perajpur        | IAR, 1961-1962 | Dhulia District                | Gravel                                                                                                                                                                                       | Middle Stone Age reported.                                                                                                                                                             |
| <b>152</b> | Bhadvad-Khurd   | IAR, 1961-1962 | Dhulia District                | Lowest Gravel                                                                                                                                                                                | Artefacts from late Acheulean to Late Stone Age were reported.                                                                                                                         |
| <b>153</b> | Sand Nullah     | IAR, 1961-1962 | Ramtek                         | Loose gravel                                                                                                                                                                                 | Middle Stone Age artefacts reported.                                                                                                                                                   |
| <b>154</b> | Chandoli        | IAR, 1962-1963 | Poona District, Ghod River     | Gravel overlaying reddish yellow kankarised silt                                                                                                                                             | Middle Stone Age artefacts reported from the gravel.<br>Two Early Stone Age choppers made on dolerite and few Middle Stone Age artefacts recovered from loose gravel on the river bed. |
| <b>155</b> | Ralakallava     | IAR, 1963-1964 | Vedullacheruvu, Andhra Pradesh | Loose Gravel                                                                                                                                                                                 | Early, Middle and Late Stone Age                                                                                                                                                       |
| <b>156</b> | Yeleswaram      | IAR, 1963-1964 | Yeleswaram District            | Gravel layer underlying ikshavaku horizon                                                                                                                                                    | Early and Middle Stone Age artefacts from the gravel layer reported.                                                                                                                   |
| <b>157</b> | Gudiyum         | IAR, 1963-1964 | Chingleput District            | Lower pebble gravel (GDM I)                                                                                                                                                                  | Unfinished handaxe                                                                                                                                                                     |
| <b>158</b> | Wainganga river | IAR, 1963-1964 | Chanda District                | Exposed gravel bed                                                                                                                                                                           | Early and Middle Stone Age artefacts reported.                                                                                                                                         |
| <b>159</b> | Wardha river    | IAR, 1963-1964 | Chanda District                | Exposed gravel bed                                                                                                                                                                           | Early and Middle Stone Age artefacts reported.                                                                                                                                         |
| <b>160</b> | Mhasdi          | IAR, 1963-1964 | Dhulia District,               | Lower and middle and upper gravel beds                                                                                                                                                       | Middle Stone Age artefacts from lower gravel, flakes on jasper and agate in middle gravel and agate blade in upper gravel                                                              |
| <b>161</b> | Chande          | IAR, 1963-1964 | Poona District                 | Compact sandy gravel capped by yellow silt with kankar                                                                                                                                       | Middle Stone Age tools in gravel                                                                                                                                                       |
| <b>162</b> | Poondi          | IAR, 1965-1966 |                                | Shale, overlain by laterised shale, overlain by disconformity on laterite surface, overlain by sheet gravel overlain by redeposited laterite and sheet gravel (primary or redeposited again) | Late Acheulean artefacts from sheet gravel underlying the redeposited laterite were reported. Middle Stone Age artefacts from topmost sheet gravel were also reported.                 |



|     |                |                |                                |                                                                     |                                                                                                                                                                              |
|-----|----------------|----------------|--------------------------------|---------------------------------------------------------------------|------------------------------------------------------------------------------------------------------------------------------------------------------------------------------|
| 163 | Gang Nullah    | IAR, 1965-1966 |                                | A hard cemented gravel, overlain by loose fine gravel               | Flake tools from hard cemented gravel and Middle Stone Age artefacts from loose fine gravel were reported.                                                                   |
| 164 | Rassa Nullah   | IAR, 1965-1966 |                                | Cemented gravel                                                     | Flakes and cores                                                                                                                                                             |
| 165 | Walgaon        | IAR, 1965-1966 |                                | Lateritic gravel                                                    | Middle and Late Stone Age artefacts reported.                                                                                                                                |
| 166 | Ozarkhed       | IAR, 1965-1966 |                                | Lateritic gravel                                                    | Middle and Late Stone Age artefacts reported.                                                                                                                                |
| 167 | Patna Devi     | IAR, 1965-1966 |                                | Gravel deposit                                                      | Middle Stone Age artefacts comprising of flakes, scrapers, points, on chert, jasper and agate were discovered.                                                               |
| 168 | Bahadur        | IAR, 1965-1966 |                                | Stratified gravel                                                   | Late Stone Age artefacts reported                                                                                                                                            |
| 169 | Jamki          | IAR, 1965-1966 |                                | Stratified gravel                                                   | Late Stone Age artefacts reported                                                                                                                                            |
| 170 | Selbari        | IAR, 1965-1966 |                                | Stratified gravel                                                   | Late Stone Age artefacts reported                                                                                                                                            |
| 171 | Umbharadi      | IAR, 1965-1966 |                                | Stratified gravel                                                   | Late Stone Age artefacts reported                                                                                                                                            |
| 172 | Dhavliviarpada | IAR, 1965-1966 |                                | Stratified gravel                                                   | Late Stone Age artefacts reported                                                                                                                                            |
| 173 | Gangapur       | IAR, 1965-1966 | Godavari river                 | Coarse gravel overlaying basal red clay deposit                     | Early Stone Age artefacts like cores, scrapers, handaxes, cleavers and points on doleritic basalt were reported.                                                             |
| 174 | Chirki Nalla   | IAR, 1967-1968 | Ahmednagar District            | Armygdullar basalt overlain by rubble gravel capped by sandy gravel | Early and Middle Stone Age artefacts recovered from sandy gravel.<br>Middle stone age artefacts from a tool bearing gravel on the right bank of river Pravara were reported. |
| 175 | Jayakwadi Dam  | IAR, 1967-1968 | Aurangabad District            | Exposed gravels at the basal portion of thick older alluvium        | Middle Stone Age tools along with semi mineralized bones of <i>bos</i> .                                                                                                     |
| 176 | Hagargundi     | IAR, 1967-1968 | Gulbarga District, Bhima river | Sandy pebbly gravel overlain by yellow brown kankary silt           | Middle Stone Age artefacts along with fossilized animal bones were discovered.                                                                                               |
| 177 | Gurjihar       | IAR, 1968-1969 |                                | High level gravel                                                   | Defined as open air Middle Stone Age workshop site.                                                                                                                          |
| 178 | Hindupur       | IAR, 1968-1969 |                                | High level gravel                                                   | Defined as open air Middle Stone Age workshop site.                                                                                                                          |
| 179 | Inamgaon       | IAR, 1968-1969 |                                | Gravel deposit                                                      | Early Stone Age site                                                                                                                                                         |
| 180 | Hathkhamba     | IAR, 1970-1971 |                                | Laterite gravel                                                     | Microliths                                                                                                                                                                   |
| 181 | Patna          | IAR, 1970-1971 | Jalgaon District               | Fine gravel<br>Sandy pebbly gravel                                  | Late Stone Age artefacts                                                                                                                                                     |

|            |                          |                |                          |                                                    |                                                                                                                                        |
|------------|--------------------------|----------------|--------------------------|----------------------------------------------------|----------------------------------------------------------------------------------------------------------------------------------------|
| <b>182</b> | Kedar Nullah             | IAR, 1969-1970 | Jalgaon District         | Gravel                                             | Early Stone Age artefacts                                                                                                              |
| <b>183</b> | Hiran                    | IAR, 1971-1972 | Jungadh District         | Bouldary pebbly gravel                             | Middle Stone Age artefacts                                                                                                             |
| <b>184</b> | Badalpur                 | IAR, 1971-1972 | Junagadh District        | Implimentiferous Fluvial gravel                    | Unknown composition of the artefacts.                                                                                                  |
| <b>185</b> | Patne                    | IAR, 1972-1973 | Jalgaon District         | Dark brown gravel and fine reddish brown gravel    | Late Mesolithic artefacts discovered from dark brown gravel and advanced Middle Palaeolithic artefacts from fine reddish brown gravel. |
| <b>186</b> | Mula-Mutha river         | IAR, 1972-1973 | Pune District            | Lower gravel                                       | Pebble tools                                                                                                                           |
| <b>187</b> | Boyapalli                | IAR, 1973-1974 | Vishakhapatanam District | Three gravels each capped by silt                  | Late Stone Age artefacts from third gravel and Early Stone Age artefacts reported from the basal gravel.                               |
| <b>188</b> | Malampuzha               | IAR, 1973-1974 | Palghat District         | Lateritic fine gravel                              | Flakes, cores, choppers and a few blades.                                                                                              |
| <b>189</b> | Shahada                  | IAR, 1973-1974 | Dhule District           | Gravels occurring in lower levels                  | Middle Palaeolithic                                                                                                                    |
| <b>190</b> | Sarangkheda              | IAR, 1973-1974 | Dhule District           | Alluvio-colluvial gravel                           | Late Upper Palaeolithic or Mesolithic                                                                                                  |
| <b>191</b> | Yadgir                   | IAR, 1974-1975 | Gulbarga District        | Fine gravel bed capped by dark clay                | Middle Stone Age artefacts reported.                                                                                                   |
| <b>192</b> | Hunsgi                   | IAR, 1974-1975 |                          | Exposed gravel deposit                             | Acheulean assemblage                                                                                                                   |
| <b>193</b> | Sangam                   | IAR, 1975-1976 |                          | Colluvial gravel                                   | Middle Palaeolithic artefacts                                                                                                          |
| <b>194</b> | Prakasam Village         | IAR, 1975-1976 |                          | Implimentiferous thin colluvium                    | Middle Palaeolithic and Neolithic artefacts                                                                                            |
| <b>195</b> | Manjra Valley            | IAR, 1977-1978 |                          | Bed load braided river formation of gravel bars    | Early Middle Palaeolithic artefacts                                                                                                    |
| <b>196</b> | Chintalapalem            | IAR, 1977-1978 | Chittoor District        | Fine gravel overlying pebbly gravel                | Late Acheulean assemblage form fine gravel: Choppers, chopping tools, handaxes, cleavers, and scrapers.                                |
| <b>197</b> | Nandur madhmeshwar       | IAR, 1978-1979 | Nashik District          | Basal gravel bed                                   | Middle Palaeolithic artefacts comprising mainly of scrapers.                                                                           |
| <b>198</b> | Gangapur                 | IAR, 1978-1979 | Nashik District          | Exposed gravel                                     | Flakes of Acheulean character reported.                                                                                                |
| <b>199</b> | Right bank of river Ghod | IAR, 1978-1979 | Pune District            | Well sorted pebbly sandy gravel, dated to 12000 BP | Microlithic artefacts reported.                                                                                                        |
| <b>200</b> | Nagaur                   | IAR, 1978-1979 | Nagaur District          | Bouldary, Cobbly sub rounded gravel, well cemented | Lower Palaeolithic artefacts discovered.                                                                                               |
| <b>201</b> | Satanikota               | IAR, 1979-1980 | Kurnool District         | High Level Gravel                                  | Middle Palaeolithic artefacts comprising of scrapers, awls and borers.                                                                 |
| <b>202</b> | Eleru                    | IAR, 1980-1981 | East Godavari District   | Gravel beds in older alluvial deposits             | Upper Palaeolithic artefacts.                                                                                                          |

|            |                                       |                                                                                                               |                |                                                     |                                                     |                                                                                                                         |
|------------|---------------------------------------|---------------------------------------------------------------------------------------------------------------|----------------|-----------------------------------------------------|-----------------------------------------------------|-------------------------------------------------------------------------------------------------------------------------|
| <b>201</b> | Jatpole,<br>Kudavelli,<br>Patkondapur | Aralapadu,<br>Muravkonda,                                                                                     | IAR, 1980-1981 | Kurnool District                                    |                                                     |                                                                                                                         |
| <b>203</b> | Badami                                |                                                                                                               | IAR, 1980-1981 | Malaprabha River<br>(Lower reaches)                 | Cobbly pebbly gravel                                | Handaxes and cleavers reported.                                                                                         |
| <b>204</b> | Cholchud                              |                                                                                                               | IAR, 1980-1981 | Malaprabha river (Lower reaches)                    | Modern channel gravels                              | Middle Palaeolithic artefacts reported.                                                                                 |
| <b>205</b> | Nandikeshwar                          |                                                                                                               | IAR, 1980-1981 | Malaprabha river (Lower reaches)                    | Modern channel gravels                              | Middle Palaeolithic artefacts reported.                                                                                 |
| <b>206</b> | Shivyog Mandir                        |                                                                                                               | IAR, 1980-1981 | Malaprabha river (Lower reaches)                    | Modern channel gravels                              | Middle Palaeolithic artefacts reported.                                                                                 |
| <b>207</b> | Nagrhal                               |                                                                                                               | IAR, 1980-1981 | Malaprabha river (Lower reaches)                    | Modern channel gravels                              | Middle Palaeolithic artefacts reported.                                                                                 |
| <b>208</b> | Uppinangadi                           |                                                                                                               | IAR, 1980-1981 | South Kanara District,<br>along the river Netravati | Gravel bed                                          | Mesolithic artefacts comprising of scrapers, blades, borers, burins, lunates, flakes, and cores reported.               |
| <b>209</b> | Mani                                  |                                                                                                               | IAR, 1980-1981 | South Kanara District,<br>along the river Netravati | Gravel bed                                          | Mesolithic artefacts comprising of scrapers, blades, borers, burins, lunates, flakes, and cores reported.               |
| <b>210</b> | Inamgaon                              |                                                                                                               | IAR, 1980-1981 | Pune District                                       | Sandy pebbly gravel and yellow sandy silt           | Middle Palaeolithic artefacts comprising of scrapers, flakes and cores along with vertebrate fossil remains discovered. |
| <b>211</b> | Muravkonda                            |                                                                                                               | IAR, 1980-1981 | Kurnool District                                    | High level gravel                                   | Middle Palaeolithic artefacts.                                                                                          |
| <b>212</b> | Manjra Valley                         |                                                                                                               | IAR, 1984-1985 | Nizambad District                                   | Cemented bouldary, pebbly gravel                    | Middle Palaeolithic artefacts.                                                                                          |
| <b>213</b> | Sadab                                 |                                                                                                               | IAR, 1989-1990 | Gulbarga District                                   | Colluvial gravel                                    | Acheulean assemblage comprising of cleaver, handaxes, knives, cores and flakes reported                                 |
| <b>214</b> | Bori                                  |                                                                                                               | IAR, 1989-1990 | Pune District                                       | Gravel                                              | Acheulean assemblage.                                                                                                   |
| <b>215</b> | Ranjani                               |                                                                                                               | IAR, 1989-1990 | Pune District                                       | Weathered gravel                                    | Middle Palaeolithic artefacts.                                                                                          |
| <b>216</b> | Hunsgi Nullah                         |                                                                                                               | IAR, 1996-1997 | Gulbarga District                                   | Colluvial gravel                                    | Middle Palaeolithic artefacts.                                                                                          |
| <b>217</b> | Isampur                               |                                                                                                               | IAR, 1998-1999 | Gulbarga District                                   | Colluvial gravel                                    | Middle Palaeolithic artefacts.                                                                                          |
| <b>218</b> | Attirampakam                          | Pappu, Shanti, <i>et al.</i><br>Excavation at<br>Attirampakam,<br>Tiruvallur Taluk,<br>District Chengai-Anna. |                | Chengai-Anna District                               | Ferricrete gravel overlying clays<br>disconformably | Late Middle Palaeolithic and post Middle Palaeolithic artefacts.                                                        |
|            | Shorapur Doab                         |                                                                                                               | Paddayya 1971  | Gulbarga District                                   | High Level Gravel                                   |                                                                                                                         |

| <b>NORTH, WEST AND NORTH WEST</b> |                                |                 |                         |           |                                                                                  |                                                                                                                                                                                  |
|-----------------------------------|--------------------------------|-----------------|-------------------------|-----------|----------------------------------------------------------------------------------|----------------------------------------------------------------------------------------------------------------------------------------------------------------------------------|
| <b>219</b>                        | Tajpura                        | IAR, 1954-1955  | Chittorgarh Rajasthan   | District, | Gravel beds overlain and underlain by conglomerate beds                          | Lithics recovered from the gravel beds consisting of large number of cleavers and a few handaxes.                                                                                |
| <b>220</b>                        | Bhangarh                       | IAR, 1955-1956  | Alwar, Rajasthan        | Northern  | Implement bearing gravel beds alternating with silt deposits                     | Abevellio-Acheulean type industry                                                                                                                                                |
| <b>221</b>                        | Sarupganj                      | IAR, 1959-1960  | River Banas, Rajasthan  | Eastern   | Cemented gravel                                                                  | Unknown composition.                                                                                                                                                             |
| <b>222</b>                        | Gambhiri                       | IAR, 1961-1962  | Chitorgarh Rajasthan    | District, | Silt overlaying shale bedrock covered by recent loose gravel                     | 10 tools from lower portion of the gravel including miniature handaxes and cleavers cum handaxes.                                                                                |
| <b>223</b>                        | Hamirgarh                      | IAR, 1958-1959  | Bhilwara Rajasthan      | District, | 6 ft. thick deposit of cemented gravel capped by 15 ft. of silt                  | Series I artefacts from cemented gravel comprising of pebble cores, scrapers, choppers, handaxes, cleavers flakes and clactonian flakes.                                         |
| <b>224</b>                        | Kapadvanj                      | IAR, 1958-1959  | Sabarkantha Gujrat      | District, | Gravelly floodplain terrace of Majham river                                      | Palaeolithic tools including and ovate made in vaal technique; generally made on fine grained quartzite not available locally.                                                   |
| <b>225</b>                        | Kathiawar                      | IAR, 1962-1963  | Rajkot District, Gujrat |           | Lower and Upper gravels                                                          | Early and Middle Stone Age tools                                                                                                                                                 |
| <b>226</b>                        | Desalpur, Khari Nullah, Mathal | IAR, 1963-1964  | District Kutch, Gujrat  |           | Loose gravel and silt                                                            | Middle Stone Age artefacts                                                                                                                                                       |
| <b>227</b>                        | Bichore                        | IAR, 1963-1964  | Chittorgarh District    |           | Gravel overlain by silt, another gravel layer capped by loamy soil               | Early Stone Age artefact from lower gravel comprising of handaxes, cleavers, flakes and scrapers.                                                                                |
| <b>228</b>                        | Kadambali                      | IAR, 1963-1964  | Chittorgarh District    |           | Pebbly gravel, overlain by concretionary clay, overlain by sandy gravel and silt | Early and Middle Stone Age tools from pebbly and sandy gravel.                                                                                                                   |
| <b>229</b>                        | Aditeshwar                     | IAR, 1966-1967  | Broach District         |           | River gravels                                                                    | Middle Stone Age comprising of cores of various types, blade-flakes, scrapers and burins were reported along with Late Stone Age assemblage comprising of blade and blade cores. |
| <b>230</b>                        | Sabhrai                        | IAR, 1966-1967  | Kutch District          |           | Gravels of sai river                                                             | Pebble and core tools.                                                                                                                                                           |
| <b>231</b>                        | Angia                          | IAR, 1966-1967. | Kutch District          |           | Gravel grading into calcareous red brown silt                                    | Few flakes, one cleaver and a few core like chunks discovered.                                                                                                                   |
| <b>232</b>                        | Dharangandhra                  | IAR, 1966-1967. | Saurashtra              |           | Well cemented sheet Gravel                                                       | Early and Middle Stone Age artefacts.                                                                                                                                            |

|     |                        |                |                   |                                                                                                                                                                   |                                                                                                                                                                            |
|-----|------------------------|----------------|-------------------|-------------------------------------------------------------------------------------------------------------------------------------------------------------------|----------------------------------------------------------------------------------------------------------------------------------------------------------------------------|
| 233 | Jetpur and Doraji      | IAR, 1966-1967 | Saurashtra        | Well cemented pebbly sandy gravels                                                                                                                                | Middle Stone Age artefacts comprising of single and double edged side scrapers, borers, points, blade flakes, simple flakes etc.                                           |
| 234 | Umrethi                | Pappu          | Junagadh District | Bottom to Top:<br>1. Basalt Deccan Trapp<br>2. Sandy pebbly gravel<br>3. Miliolite limestone<br>4. Gravel layer with sand, silts and clay<br>5. Miliolite deposit | Lower Palaeolithic artefacts from lowermost gravel layer.<br>Middle Palaeolithic artefacts from second gravel layer.                                                       |
| 235 | Atkot                  | IAR, 1969-1970 | Rajkot District   | Sandy pebbly gravel                                                                                                                                               | Early Stone Age site                                                                                                                                                       |
| 236 | Khaparia               | IAR, 1969-1970 | Valsad District   | Exposed sandy pebbly gravel on the left bank of river Purna                                                                                                       | Large number of flakes                                                                                                                                                     |
| 237 | Khatgarh               | IAR, 1970-1971 | River Mej         | Loose gravel                                                                                                                                                      | Early and Middle Stone Age                                                                                                                                                 |
| 238 | Khandiala Khad         | IAR, 1971-1972 | Ambala District   | Semi compact gravel bed                                                                                                                                           | A rolled handaxe and a cleaver.                                                                                                                                            |
| 239 | Jayal                  | Pappu          | Nagaur District   | Gravel Ridge                                                                                                                                                      | Lower Palaeolithic                                                                                                                                                         |
| 240 | Marhanwala             | IAR, 1971-1972 | Ambala District   | Gravel bed                                                                                                                                                        | Two heavily rolled large choppers.                                                                                                                                         |
| 241 | Markanda Valley        | IAR, 1973-1974 | Nahan District    | River gravel on terraces                                                                                                                                          | Pebble tools, pebble flakes, choppers and scrapers on quartzite.                                                                                                           |
| 242 | Valley fill miliolites | IAR, 1976-1977 | Junagadh District | High Channel Gravels<br><br>Alluvial gravels and silts                                                                                                            | Palaeolithic artefacts of unknown composition were discovered from high channel gravels. Only Middle Palaeolithic artefacts were discovered from alluvial gravel and silt. |
| 243 | Jael                   | IAR, 1977-1978 | Nagaur District   | Piedmont gravel                                                                                                                                                   | Flakes, side scrapers and end scrapers.                                                                                                                                    |
| 244 | Mosabar                | IAR, 1986-1987 | Vadodra District  | Cobbly gravel                                                                                                                                                     | Acheulean assemblage.                                                                                                                                                      |
| 245 | Laphni                 | IAR, 1986-1987 | Vadodra District  | Cobbly gravel                                                                                                                                                     | Acheulean assemblage.                                                                                                                                                      |
| 246 | Duma                   | IAR, 1986-1987 | Vadodra District  | Cobbly gravel                                                                                                                                                     | Acheulean assemblage.                                                                                                                                                      |
| 247 | Baskario               | IAR, 1986-1987 | Vadodra District  | Cobbly gravel                                                                                                                                                     | Acheulean assemblage.                                                                                                                                                      |
| 248 | Uchhet                 | IAR, 1986-1987 | Vadodra District  | Cobbly gravel                                                                                                                                                     | Acheulean assemblage.                                                                                                                                                      |
| 249 | Uchhakalam             | IAR, 1986-1987 | Vadodra District  | Cobbly gravel                                                                                                                                                     | Acheulean assemblage.                                                                                                                                                      |
| 250 | Bahadarpur             | IAR, 1986-1987 | Vadodra District  | Cobbly gravel                                                                                                                                                     | Acheulean assemblage.                                                                                                                                                      |
| 251 | Chuchhapura            | IAR, 1986-1987 | Vadodra District  | Cobbly gravel                                                                                                                                                     | Acheulean assemblage.                                                                                                                                                      |
| 252 | Wadeli                 | IAR, 1986-1987 | Vadodra District  | Cobbly gravel                                                                                                                                                     | Acheulean assemblage.                                                                                                                                                      |

|                 |                                                                                                                         |                               |                      |                      |                                      |           |
|-----------------|-------------------------------------------------------------------------------------------------------------------------|-------------------------------|----------------------|----------------------|--------------------------------------|-----------|
| 253             | Ratanpur                                                                                                                | IAR, 1988-1989.               | Vadodra District     | River gravel         | Secondarily deposited<br>assemblage. | Acheulean |
| 254             | Samdhi                                                                                                                  | IAR, 1988-1989..              | Vadodra District     | River gravel         | Secondarily deposited<br>assemblage  | Acheulean |
| 255             | Sukhi river                                                                                                             | IAR, 1992-1993                | Vadodra District     | Coarse pebbly gravel | Acheulean assemblage.                |           |
| <b>SIWALIKS</b> |                                                                                                                         |                               |                      |                      |                                      |           |
| 256             | Guler                                                                                                                   | Mohapatra, 1966               | Kangra District      | Fluvial terraces     | Soanian                              |           |
| 257             | Anantnag, Kanjdori,<br>Ganeshpur, Batakut,<br>Nunawan, Chandanwadi,<br>Shishramnag, Pahalgam                            | Sankalia, H.D., 1971          | Jammu and Kashmir    | Fluvial Terraces     | Soanian                              |           |
| 258             | Tira Sujanpur, Alampur,<br>Dehra Gopipur, Nadaun,<br>Bari, Maleta, Boughta,<br>Sirha, Haripur, Guler,<br>Jakkar, Suneta | Mohapatra, 1966               | Beas Banganga Valley | Fluvial terraces     | Soanian                              |           |
| 259             | Jamal, Kotla, Panjasaran,<br>Kupar Lahr, Hatli, Rait,<br>Saketi, Basa harialan,<br>Chatroli, Matholi, Dibbar,           | Sankalia, 1974                | Beas Banganga Valley | Fluvial Terraces     | Soanian                              |           |
| 260             | Mullanpur                                                                                                               | Sharma, 1977                  | SAS Nagar, Punjab    | Boulder Conglomerate | Soanian                              |           |
| 261             | Tilokpur, Moginand, Kala<br>Amb, Saketi, Bikramabad,<br>Bheron, Kolar, Kodewala,<br>Palhori, Majra, Dhoka,<br>Garibnath | Verma and Srivastava,<br>1984 | Sirmaur District     | Fluvial terraces     | Soanian                              |           |
| 262             | Khoiwala, Marhanwala,<br>Baddi, Sandholi, Bhud,<br>Nalagarh, Dhang                                                      | Karir, 1985                   | Nalagarh             | Fluvial Terraces     | Soanian                              |           |
| 263             | Katra                                                                                                                   | Ganjoo, <i>et al.</i> 1993    | Jammu and Kashmir    | Fluvial Terraces     | Soanian                              |           |
| 264             | Bara, Dher Majra                                                                                                        | Soni and Soni, 2017           | Punjab               | Fluvial Terraces     | Soanian                              |           |
| 265             | Chikni                                                                                                                  | Karir, 1985                   | Sirsa Valley         | Fluvial Terraces     | Soanian                              |           |

|                            |             |                |                     |           |                                |                                                                                                                                                                                                                                                                                                                                                                                 |
|----------------------------|-------------|----------------|---------------------|-----------|--------------------------------|---------------------------------------------------------------------------------------------------------------------------------------------------------------------------------------------------------------------------------------------------------------------------------------------------------------------------------------------------------------------------------|
| <b>266</b>                 | Jainti Devi | Sharma, 1977   |                     |           | Boulder Conglomerate Formation | Handaxes and cleavers                                                                                                                                                                                                                                                                                                                                                           |
| <b>EAST AND NORTH EAST</b> |             |                |                     |           |                                |                                                                                                                                                                                                                                                                                                                                                                                 |
| <b>267</b>                 | Talcher     | IAR, 1957-1958 | Dhenkanal<br>Odisha | District, | Laterite gravel                | Series I type of artefacts                                                                                                                                                                                                                                                                                                                                                      |
| <b>268</b>                 | Champua     | IAR, 1958-1959 | Odisha              |           | Coarse gravel and Fine Gravel  | Series I type from Coarse Gravel comprising of handaxes, cleavers and scrapers in addition with chopper chopping tools made on quartzite.<br>Series I and II artefacts in fine gravel layer. Only Series II type of artefacts comprising of points, scrapers, borers, burins, blades, scrapers and flakes.<br>Series II artefacts mostly made on chert, jasper, and chalcedony. |
| <b>269</b>                 | Ramla       | IAR, 1958-1959 | Odisha              |           | Coarse gravel and Fine Gravel  | Series I type from Coarse Gravel comprising of handaxes, cleavers and scrapers in addition with chopper chopping tools made on quartzite.<br>Series I and II artefacts in fine gravel layer. Only Series II type of artefacts comprising of points, scrapers, borers, burins, blades, scrapers and flakes.<br>Series II artefacts mostly made on chert, jasper, and chalcedony. |
| <b>270</b>                 | Kandalia    | IAR, 1958-1959 | Odisha              |           | Coarse gravel and Fine Gravel  | Series I type from Coarse Gravel comprising of handaxes, cleavers and scrapers in addition with chopper chopping tools made on quartzite.<br>Series I and II artefacts in fine gravel layer. Only Series II type of artefacts comprising of points, scrapers, borers, burins, blades, scrapers and flakes.<br>Series II artefacts mostly made on chert, jasper, and chalcedony. |
| <b>271</b>                 | Patna       | IAR, 1958-1959 | Odisha              |           | Coarse gravel and Fine Gravel  | Series I type from Coarse Gravel comprising of handaxes, cleavers and                                                                                                                                                                                                                                                                                                           |

|     |             |                |        |                               |                                                                                                                                                                                                                                                                                                                                                                                                |
|-----|-------------|----------------|--------|-------------------------------|------------------------------------------------------------------------------------------------------------------------------------------------------------------------------------------------------------------------------------------------------------------------------------------------------------------------------------------------------------------------------------------------|
|     |             |                |        |                               | <p>scrapers in addition with chopper chopping tools made on quartzite.</p> <p>Series I and II artefacts in fine gravel layer. Only Series II type of artefacts comprising of points, scrapers, borers, burins, blades, scrapers and flakes.</p> <p>Series II artefacts mostly made on chert, jasper, and chalcedony.</p>                                                                       |
| 272 | Jaganathpur | IAR, 1958-1959 | Odisha | Coarse gravel and Fine Gravel | <p>Series I type from Coarse Gravel comprising of handaxes, cleavers and scrapers in addition with chopper chopping tools made on quartzite.</p> <p>Series I and II artefacts in fine gravel layer. Only Series II type of artefacts comprising of points, scrapers, borers, burins, blades, scrapers and flakes.</p> <p>Series II artefacts mostly made on chert, jasper, and chalcedony.</p> |
| 273 | Bahalda     | IAR, 1958-1959 | Odisha | Coarse gravel and Fine Gravel | <p>Series I type from Coarse Gravel comprising of handaxes, cleavers and scrapers in addition with chopper chopping tools made on quartzite.</p> <p>Series I and II artefacts in fine gravel layer. Only Series II type of artefacts comprising of points, scrapers, borers, burins, blades, scrapers and flakes.</p> <p>Series II artefacts mostly made on chert, jasper, and chalcedony.</p> |
| 274 | Bisai       | IAR, 1958-1959 | Odisha | Coarse gravel and Fine Gravel | <p>Series I type from Coarse Gravel comprising of handaxes, cleavers and scrapers in addition with chopper chopping tools made on quartzite.</p> <p>Series I and II artefacts in fine gravel layer. Only Series II type of artefacts comprising of points, scrapers, borers, burins, blades, scrapers and flakes.</p> <p>Series II artefacts mostly made on chert, jasper, and chalcedony.</p> |



|            |               |                |                               |                                                    |                                                                                                                                                                                                                                                                                                                                                                           |
|------------|---------------|----------------|-------------------------------|----------------------------------------------------|---------------------------------------------------------------------------------------------------------------------------------------------------------------------------------------------------------------------------------------------------------------------------------------------------------------------------------------------------------------------------|
| <b>275</b> | Kandalia      | IAR, 1958-1959 | Odisha                        | Coarse gravel and Fine Gravel                      | Series I type from Coarse Gravel comprising of handaxes, cleavers and scrapers in addition with chopper chopping tools made on quartzite. Series I and II artefacts in fine gravel layer. Only Series II type of artefacts comprising of points, scrapers, borers, burins, blades, scrapers and flakes. Series II artefacts mostly made on chert, jasper, and chalcedony. |
| <b>276</b> | Barhai        | IAR, 1958-1959 | Odisha                        | Coarse gravel and Fine Gravel                      | Series I type from Coarse Gravel comprising of handaxes, cleavers and scrapers in addition with chopper chopping tools made on quartzite. Series I and II artefacts in fine gravel layer. Only Series II type of artefacts comprising of points, scrapers, borers, burins, blades, scrapers and flakes. Series II artefacts mostly made on chert, jasper, and chalcedony. |
| <b>277</b> | Baddih        | IAR, 1959-1960 | Bankura District, West Bengal | Cemented gravel                                    | Handaxes, ovates and cleavers.                                                                                                                                                                                                                                                                                                                                            |
| <b>278</b> | Hathikheda    | IAR, 1959-1960 | Bankura District, West Bengal | Cemented gravel                                    | Handaxes, ovates and cleavers.                                                                                                                                                                                                                                                                                                                                            |
| <b>279</b> | Chaida        | IAR, 1959-1960 | Bankura District, West Bengal | Cemented gravel                                    | Handaxes, ovates and cleavers.                                                                                                                                                                                                                                                                                                                                            |
| <b>280</b> | Kuchai        | IAR, 1961-1960 | Mayurbhanj District, Odisha   | Gravel mixed with greyish earth and loose laterite | Microliths essentially of non-geometric character reported.                                                                                                                                                                                                                                                                                                               |
| <b>281</b> | Dhalkishore   | IAR, 1961-1960 | Bankura District              | Lateritic Gravel                                   | Unifacial and bifacial choppers on pebbles, handaxes, cleavers on core and flakes reported.                                                                                                                                                                                                                                                                               |
| <b>282</b> | Kasabanti     | IAR, 1961-1962 | Bankura District              | Lateritic Gravel                                   | Unifacial and bifacial choppers on pebbles, handaxes, cleavers on core and flakes reported.                                                                                                                                                                                                                                                                               |
| <b>283</b> | Kumari valley | IAR, 1961-1962 | Bankura District              | Lateritic Gravel                                   | Unifacial and bifacial choppers on pebbles, handaxes, cleavers on core and flakes reported.                                                                                                                                                                                                                                                                               |

|            |                                 |                 |                                      |                                              |                                                                                                                                                                                        |
|------------|---------------------------------|-----------------|--------------------------------------|----------------------------------------------|----------------------------------------------------------------------------------------------------------------------------------------------------------------------------------------|
| <b>284</b> | Goplapur,                       | IAR, 1962-1963  | Singhbum District, Subarnekh R. Bank | Gravel overlain by clay                      | Early and Middle Stone Age artefacts.                                                                                                                                                  |
| <b>285</b> | Harindubri                      | IAR, 1962-1963  | Singhbum District, Subarnekh R. Bank | Gravel overlain by clay                      | Early and Middle Stone Age artefacts.                                                                                                                                                  |
| <b>286</b> | Hirjihati                       | IAR, 1962-1963  | Singhbum District, Subarnekh R. Bank | Gravel overlain by clay                      | Early and Middle Stone Age artefacts.                                                                                                                                                  |
| <b>287</b> | Jaganathpur                     | IAR, 1962-1963  | Singhbum District, Subarnekh R. Bank | Gravel overlain by clay                      | Early and Middle Stone Age artefacts.                                                                                                                                                  |
| <b>288</b> | Murganhata                      | IAR, 1962-1963  | Singhbum District, Subarnekh R. Bank | Gravel overlain by clay                      | Early and Middle Stone Age artefacts.                                                                                                                                                  |
| <b>289</b> | Thakurani,                      | IAR, 1962-1963  | Singhbum District, Subarnekh R. Bank | Gravel overlain by clay                      | Early and Middle Stone Age artefacts.                                                                                                                                                  |
| <b>290</b> | Tumangdungri                    | IAR, 1962-1963  | Singhbum District, Subarnekh R. Bank | Gravel overlain by clay                      | Early and Middle Stone Age artefacts.                                                                                                                                                  |
| <b>291</b> | Sebalgiri                       | IAR, 1966-1967  | Garohills                            | Eroded gravelly surface                      | Five handaxes, two picks, five discs, one hundred and fifty eight scrapers, twenty borers, sixty six blades, twenty six large knives and points, arrowheads, spearheads etc. reported. |
| <b>292</b> | Chibrigiri                      | IAR, 1972-1973  | Garohills                            | Coarse gravel                                | Early Stone Age artefacts.                                                                                                                                                             |
| <b>293</b> | Ghurghutipara                   | IAR, 1973-1974  | Burdwan District                     | Top of the gravel bed                        | Microlithic blades, flakes on quartz, chalcedony, jasper and chert.                                                                                                                    |
| <b>294</b> | Rongram                         | IAR, 1977-1978  | Garohills                            | Weather bouldary-pebbly gravel               | Stone age artefacts                                                                                                                                                                    |
| <b>295</b> | Daridungri                      | IAR, 1983-1984  | Saran District                       | Lateritic gravel                             | Early, Middle and Late stone age artefacts reported from lateritic gravel.                                                                                                             |
|            |                                 |                 |                                      | Loose gravel on the paleochannel of Mahanadi | Cleavers and handaxes discovered in the loose gravel in the palaeochannel.                                                                                                             |
| <b>296</b> | Brahmani Nullah                 | IAR, 1983-1984  | Sundargarh District                  | Gravel Bed                                   | Handaxes, cleaver, chopper and chopping tool.                                                                                                                                          |
| <b>297</b> | Sankh Nullah                    | IAR, 1983-1984  | Sundargarh District                  | Gravel Bed                                   | Handaxes, cleaver, chopper and chopping tool.                                                                                                                                          |
| <b>298</b> | Deo Nullah                      | IAR, 1983-1984  | Sundargarh District                  | Gravel Bed                                   | Handaxes, cleaver, chopper and chopping tool.                                                                                                                                          |
| <b>299</b> | Jhirpani                        | IAR, 1983-1984  | Sundargarh District                  | Fine gravel                                  | Middle Palaeolithic artefacts                                                                                                                                                          |
| <b>300</b> | Susunia                         | IAR, 1985-1986  | Bankura District                     | gravel                                       | Early Stone Age artefacts                                                                                                                                                              |
| <b>301</b> | Maluti                          | IAR, 1988-1989. |                                      | Channel gravel                               | Acheulean                                                                                                                                                                              |
| <b>302</b> | Middle reaches of Chillah river | IAR, 1988-1989. |                                      | Fluvial gravel                               | Scrapers, points, borers, notches                                                                                                                                                      |

|            |           |                |                |                                    |                                                                                                                  |
|------------|-----------|----------------|----------------|------------------------------------|------------------------------------------------------------------------------------------------------------------|
| <b>303</b> | Balangi   | IAR, 1999-2000 | Angul District | Gravel deposit<br>Cemented gravel  | Waterborne Mesolithic fluted cores from gravel deposit. Neolithic chisel and adze reported from cemented gravel. |
| <b>304</b> | Bilinda   | IAR, 1999-2000 | Angul District | Gravel deposit                     | Lower Palaeolithic scraper and handaxe.                                                                          |
| <b>305</b> | Ekagharia | IAR, 1999-2000 | Angul District | Alluvium mixed with gravel deposit | Lower Palaeolithic handaxe, Neolithic chisel and mace head.                                                      |

- Badam, G.L. et al. 1984. Exploration in district Narsinghpur. In: Mittra, D. (ed.) *Indian Archaeology (1981–82) – a Review*. Archaeological Survey of India, New Delhi.
- Bisht, R.S. 1975. Exploration around Pinjore, District Ambala. In: Deshpande, M.N. (ed.) *Indian Archaeology (1971–72) – a Review*. Archaeological Survey of India, New Delhi.
- Bopardikar, B.P.S. et al. 1979. Exploration in districts Hoshangabad and West Nimar. In: Thapar, B.K. (ed.) *Indian Archaeology (1974–75) – a Review*. Archaeological Survey of India, New Delhi.
- Chitale, D.B. 1973. Exploration in District Valsad. In: Lal, B.B. (ed.) *Indian Archaeology (1969–70) – a Review*. Archaeological Survey of India, New Delhi.
- Ghosh, A.K. 1969. Exploration in district Ranchi. In: Ghosh, A. (ed.) *Indian Archaeology (1964–65) – a Review*. Archaeological Survey of India, New Delhi.
- Ghosh, N.C. et al. 1993. Exploration in the Chillah river Valley, District Birbhum (W.B.) and Dumka (Bihar). In: Joshi, M.C. (ed.) *Indian Archaeology (1988–89) – a Review*. Archaeological Survey of India, New Delhi.
- Goswamy, M.C. and Sharma, T.C. 1975. Exploration in Garo Hills. In: Deshpande, M.N. (ed.) *Indian Archaeology (1966–67) – a Review*. Archaeological Survey of India, New Delhi.
- Isaac, N. 1959. Exploration in District Kurnool. In: Ghosh, A. (ed.) *Indian Archaeology (1958–59) – a Review*. Archaeological Survey of India, New Delhi.
- Isaac, N. and Sankalia, H.D. 1996. Exploration in District Kurnool. In: Ghosh, A. (ed.) *Indian Archaeology (1959–60) – a Review*. Archaeological Survey of India, New Delhi.
- Joshi, R.V. 1979. Exploration in district Palghat. In: Thapar, B.K. (ed.) *Indian Archaeology (1973–74) – a Review*. Archaeological Survey of India, New Delhi.
- Joshi, R.V. 1996. Exploration in district Wardha and Nagour. In: Ghosh, A. (ed.) *Indian Archaeology (1959–60) – a Review*. Archaeological Survey of India, New Delhi.
- Joshi, R.V. and Sankalia, H.D. 1975. Exploration in West Nimar district. In: Deshpande, M.N. (ed.) *Indian Archaeology (1966–67) – a Review*. Archaeological Survey of India, New Delhi.
- Joshi, R.V. et al. 1959. Exploration in district West Khandesh. In: Ghosh, A. (ed.) *Indian Archaeology (1958–59) – a Review*. Archaeological Survey of India, New Delhi.
- Joshi, J.P. et al. 1968. Exploration in district Kutch. In: Lal, B.B. (ed.) *Indian Archaeology (1967–68) – a Review*. Archaeological Survey of India, New Delhi.
- Joshi, R.V. et al. 1969. Exploration in district Monghyr. In: Ghosh, A. (ed.) *Indian Archaeology (1964–65) – a Review*. Archaeological Survey of India, New Delhi.
- Joshi, R.V. et al. 1973. Exploration in District Dhulia. In: Ghosh, A. (ed.) *Indian Archaeology (1965–66) – a Review*. Archaeological Survey of India, New Delhi.
- Joshi, R.V. et al. 1979. Exploration in District Nahan. In: Thapar, B.K. (ed.) *Indian Archaeology (1973–74) – a Review*. Archaeological Survey of India, New Delhi.
- Joshi, R.V. et al. 1980a. Exploration in Bhir, Sholapur and Nanded. In: Thapar, B.K. (ed.) *Indian Archaeology (1977–78) – a Review*. Archaeological Survey of India, New Delhi.
- Joshi, R.V. et al. 1980b. Exploration in Districts Bhavnagar, Jamnagar, Junagadh and Rajkot. In: Thapar, B.K. (ed.) *Indian Archaeology (1976–77) – a Review*. Archaeological Survey of India, New Delhi.
- Jrushnaswami, V.D. 1996. Exploration in District Bankura and Purulia. In: Ghosh, A. (ed.) *Indian Archaeology (1959–1960) – a Review*. Archaeological Survey of India, New Delhi.
- Khatri, A.P. 1959. Exploration in district Sagar. In: Ghosh, A. (ed.) *Indian Archaeology (1958–59) – a Review*. Archaeological Survey of India, New Delhi.
- Khatri, A.P. 1996. Explorations in district Bhilsa and Guna. In: Ghosh, A. (ed.) *Indian Archaeology (1959–60) – a Review*. Archaeological Survey of India, New Delhi.
- Lal, B.B. 1993. Exploration in districts Kolaba and Thana. In: Ghosh, A. (ed.) *Indian Archaeology (1957–58) – a Review*. Archaeological Survey of India, New Delhi.
- Lele, V.S. 1973. Exploration in District Rajkot. In: Lal, B.B. (ed.) *Indian Archaeology (1969–70) – a Review*. Archaeological Survey of India, New Delhi.
- Malwad, S.S. 1993. Exploration in Bombay-Karnataka. In: Ghosh, A. (ed.) *Indian Archaeology (1955–56) – a Review*. Archaeological Survey of India, New Delhi.

- Mishra, S. and Ghate, S. 1994. Exploration in district Pune. In: Mahapatra, S.K. (ed.) *Indian Archaeology (1989–90) – a Review*. Archaeological Survey of India, New Delhi.
- Misra, V.N. 1996. Exploration in district Chitorgarh, Jodhpur, Pali and Udaipur. In: Ghosh, A. (ed.) *Indian Archaeology (1959–60) – a Review*. Archaeological Survey of India, New Delhi.
- Misra, B.B. and Gupta, M.C. 1990. Exploration in the Belan Valley, District Allahabad. In: Joshi, J.P. (ed.) *Indian Archaeology (1985–86) – a Review*. Archaeological Survey of India, New Delhi.
- Misra, V.N. et al. 1981. Exploration in district Nagaur. *Indian Archaeology (1978–79) – a Review*. Archaeological Survey of India, New Delhi.
- Mukerjee, S.C. et al. 1990. Exploration in district Bankura. In: Joshi, J.P. (ed.) *Indian Archaeology (1985–86) – a Review*. Archaeological Survey of India, New Delhi.
- Narain, A.K. and Pant, P.C. 1965. Exploration in districts Basti, Deoria, Ghazipur, Gonda, Jaunpur and Varanasi. In: Ghosh, A. (ed.) *Indian Archaeology (1962–63) – a Review*. Archaeological Survey of India, New Delhi.
- Narayan, L.A. 1973. Exploration in District Gaya. In: Lal, B.B. (ed.) *Indian Archaeology (1969–70) – a Review*. Archaeological Survey of India, New Delhi.
- Ota, S.B. and Ansari, Z.D. 1957. Exploration in the Tapti Valley. In: Ghosh, A. (ed.) *Indian Archaeology (1956–57) – a Review*. Archaeological Survey of India, New Delhi.
- Paddayya, K. 2002. Exploration in District Gulbarga. *Indian Archaeology (1996–97) – a Review*. Archaeological Survey of India, New Delhi.
- Pande, B.M. 1968. Note on palaeoliths from Guler, District Kangra (Himachal Pradesh). *Current Science*, **37**.
- Pant, P.C. et al. 1983. Exploration in district Mirzapur. In: Mitra, D. (ed.) *Indian Archaeology (1980–81) – a Review*. Archaeological Survey of India, New Delhi.
- Pappu, R.S. and Prasad Rao, J.V. Exploration in district Kurnool. *Indian Archaeology (1980–81) – a Review*. Archaeological Survey of India, New Delhi.
- Prasad, A. Exploration in the Orsang Valley, District Vadodra. *Indian Archaeology (1986–87) – a Review*. Archaeological Survey of India, New Delhi.
- Reddy, K.T., Prakash, P.V., Rath, A. and Rao, U.B. 1995. A pebble tool assemblage on the Visakhapatnam Coast. *Man and Environment* **XX**, **1**.
- Sali, S.A. 1979. Exploration in district Dhule. In: Thapar, B.K. (ed.) *Indian Archaeology (1973–74) – a Review*. Archaeological Survey of India, New Delhi.
- Sali, S.A. 1993. Exploration in District West Khandesh. In: Ghosh, A. (ed.) *Indian Archaeology (1957–58) – a Review*. Archaeological Survey of India, New Delhi.
- Sali, S.A. 1996. Exploration in District Dhulia. In: Ghosh, A. (ed.) *Indian Archaeology (1960–61) – a Review*. Archaeological Survey of India, New Delhi.
- Sanakalia, H.D. and Subbarao, B. 1959. Exploration at Maheshwar, district Nimar (West). In: Ghosh, A. (ed.) *Indian Archaeology (1958–59) – a Review*. Archaeological Survey of India, New Delhi.
- Sankalia, H.D. 1957. Paleolithic sites in Bombay State. In: Ghosh, A. (ed.) *Indian Archaeology (1956–57) – a Review*. Archaeological Survey of India, New Delhi.
- Sankalia, H.D. 1975. Exploration in district Jalgaon. In: Deshpande, M.N. (ed.) *Indian Archaeology (1971–72) – a Review*. Archaeological Survey of India, New Delhi.
- Sankalia, H.D. 1993. Prehistoric and other sites in District Poona. In: Ghosh, A. (ed.) *Indian Archaeology (1957–58) – a Review*. Archaeological Survey of India, New Delhi.
- Sankalia, H.D. and Ansari, Z.D. 1965. Exploration in District Rajkot. In: Ghosh, A. (ed.) *Indian Archaeology (1962–63) – a Review*. Archaeological Survey of India, New Delhi.
- Sankalia, H.D. and Ansari, Z.D. 1975. Exploration in District Junagadh. In: Deshpande, M.N. (ed.) *Indian Archaeology (1971–72) – a Review*. Archaeological Survey of India, New Delhi.
- Sankalia, H.D. et al. 1964. Exploration in District Chittorgarh. In: Ghosh, A. (ed.) *Indian Archaeology (1961–62) – a Review*. Archaeological Survey of India, New Delhi.
- Sankalia, H.D. et al. 1971. Exploration in District Pune. In: Lal, B.B. (ed.) *Indian Archaeology (1968–69) – a Review*. Archaeological Survey of India, New Delhi.

- Sankalia, H.D. et al. 1975. Exploration in District Kutch, Junagadh and Surendranagar. *In: Deshpande, M.N. (ed.) Indian Archaeology (1966–67) – a Review*. Archaeological Survey of India, New Delhi.
- Sathe, V.G. 1987. Exploration in District Nizambad. *In: Tripathi, R.C. (ed.) Indian Archaeology (1984–85) – a Review*. Archaeological Survey of India, New Delhi.
- Sen, D. 1996a. Palaeoliths in Jabalpur. *In: Ghosh, A. (ed.) Indian Archaeology (1960–61) – a Review*. Archaeological Survey of India, New Delhi.
- Sen, D. 1996b. Upper Palaeoliths and Microliths, District Mandla. *In: Ghosh, A. (ed.) Indian Archaeology (1960–61) – a Review*. Archaeological Survey of India, New Delhi.
- Sen, D. and Ghosh, A.K. 1965. Exploration in district Singhbhum. *In: Ghosh, A. (ed.) Indian Archaeology (1962–63) – a Review*. Archaeological Survey of India, New Delhi.
- Sen, D. et al. 1964. Exploration in district Bankura, Birbhum, Burdwan, Hooghly, Jalpaiguri and Midnapur. *In: Ghosh, A. (ed.) Indian Archaeology (1961–62) – a Review*. Archaeological Survey of India, New Delhi.
- Sen, V. 1979. Microlithic site at Ghurghutipara, District Burdwan. *In: Thapar, B.K. (ed.) Indian Archaeology (1973–74) – a Review*. Archaeological Survey of India, New Delhi.
- Sharma, H.C. 1975. Exploration in District Garo Hills. *In: Deshpande, M.N. (ed.) Indian Archaeology (1971–72) – a Review*. Archaeological Survey of India, New Delhi.
- Singh, R. 1996. Exploration in district Guna, Sagar and Vidisha. *In: Ghosh, A. (ed.) Indian Archaeology (1960–61) – a Review*. Archaeological Survey of India, New Delhi.
- Soundara, K.V. 1959. Palaeolithic and Microlithic site in district Sabarkantha. *In: Ghosh, A. (ed.) Indian Review (1958–59) – a Review*. Archaeological Survey of India, New Delhi.
- Soundara Rajan, K.V. 1993. Paleolithic sites in northern Pakistan. *In: Ghosh, A. (ed.) Indian Archaeology (1955–56) – a Review*. Archaeological Survey of India, New Delhi.
- Sovani, P.V. 1957. Exploration in the Upper Godavari Valley. *In: Ghosh, A. (ed.) Indian Archaeology (1956–57) – a Review*. Archaeological Survey of India, New Delhi.
- Srinivasan, L.K. 1996a. Exploration in District Chanda. *In: Ghosh, A. (ed.) Indian Archaeology (1960–61) – a Review*. Archaeological Survey of India, New Delhi.
- Srinivasan, L.K. 1996b. Exploration in District Chanda. *In: Ghosh, A. (ed.) Indian Archaeology (1959–60) – a Review*. Archaeological Survey of India, New Delhi.
- Trivedi, C.B. 1996. Palaeoliths, District Chatapur. *In: Ghosh, A. (ed.) Indian Archaeology (1960–61) – a Review*. Archaeological Survey of India, New Delhi.
- Trivedi, G.B. 1974. Early and Middle Stone Age tools and Late Medieval remains, district Bundi. *In: Deshpande, M.N. (ed.) Indian Archaeology (1970–71) – a Review*. Archaeological Survey of India, New Delhi.
- Varma, R.K. et al. 1971. Exploration in district Allahabad, Azamgarh, Banda, Mirzapur, Pratapgarh and Sultanpur. *In: Lal, B.B. (ed.) Indian Archaeology (1968–69)*.
- Wainwright, G.J. 1964. Exploration in district Broach. *In: Ghosh, A. (ed.) Indian Archaeology (1961–62) – a Review*. Archaeological Survey of India, New Delhi.
- Wakanakar, V.S. et al. 1972. Exploration in district Pune. *In: Deshpande, M.N. (ed.) Indian Archaeology (1972–73) – a Review*. Archaeological Survey of India, New Delhi.
